# Supplementary material for: The songs of male pied flycatchers: exploring the legacy of the fathers
Source: PeerJ. 2018 Aug 1;6:e5397. doi: 10.7717/peerj.5397 (PMC6076429; doi:10.7717/peerj.5397)
Supplement: Supplemental Information 1 [file peerj-06-5397-s001.xlsx]

## Sheet: Raw data
	Sons												Fathers										Father-Son Sharing			Neighbors								Neighbor-Son sharing				Neighbor-Son sharing excluding syllables also shared with the father			Sharing father-neighbor			Sharing father-nonneighbor
	Ring no (-=x)	Year hatched	Year recruited (-=x)		Total N° syllables by song	N°different notes by song	Repertory size	Duration	Total Syllables	Song Versatility	Strophe Versatility	Age son	Ring no-father	eXpe padre	Total N° syllables by song	N° different syllables by song	Repertory size	Duration	Total SyllablesF	Song Versatility F	Strophe Versatility F	Father age 4&3=2	Sharing N°	% notes that son share with the father	DICE coef.	Ring	Total N° syllables by song	N°different notes by song	Repertory size	Duration	Total Syllables	Song Versatility	Strophe Versatility	Sharing N!	% notes that son share with the father	DICE Coef.	Syllables shared by father, neighbor-son	Sharing N°	% notes that son share with the father	DICE Coef.	Sharing N°	% notes that son share with the father	DICE Coef.	Sharing N°	% notes that son share with the father	DICE Coef.
1	H513249	1995	1996	HvRø=x96	4.84	2.68	18	1.08864	121	0.14876	0.553719	1	H488004	1	9.48	5.04	24	1.74436	237	0.101266	0.531646	1	2	11.1111	0.0952381
2	H411566	1994	1996	RøHv=x96	9.56	5.2	54	1.96944	239	0.225941	0.666667	2	H410104	2	10.32	4.68	37	1.90624	251	0.143411	0.363636	2	12	22.2222	0.263736
3	H411464	1994	1996	Gu=Olx96(493-511)	9.72	4.96	48	1.84184	243	0.197531	0.6	2	H410172	2	7.4	4.92	27	1.50136	185	0.145946	0.664865	2	6	12.5	0.16	H411213	8.96	4	17	2	224	0.0758929	0.446429	1	2.08333	0.0307692	0	1	2.08333	0.0307692	3	11.1111	0.136364
4	H488207	1996	1997	HvRø=x(71-159)	8.16	3	18	2.1308	204	0.0882353	0.367647	1	H488111	1	11.48	5.72	17	2.41092	287	0.0592334	0.498258	1	3	16.6667	0.171429
5	H488178	1996	1997	RøOr=x, 97 (132-227)	9.76	4.6	15	1.46084	244	0.0614754	0.471311	1	H488104	1	10.88	5.52	62	2.04148	272	0.227941	0.507353	1	8	53.3333	0.207792	H488112	9.24	4.48	19	1.97012	231	0.0822511	0.484848	0	0	0		0	0	0	4	6.45161	0.0987654
6	H488177	1996	1998		8.4	4.68	27	2.03916	210	0.128571	0.557143	2	H488104	1	10.88	5.52	62	2.04148	272	0.227941	0.507353	1	7	25.9259	0.157303	H488112	9.24	4.48	19	1.97012	231	0.0822511	0.484848	2	7.40741	0.0869565	1	1	3.7037	0.0434783
7	H488378	1997	1998	HvGu=x, 080598	8.56	3.52	19	1.44833	214	0.088785	0.411215	1	H488068	1	11.68	5.48	25	2.2482	292	0.0856164	0.469178	2	1	5.26316	0.0454545	H488064	7.52	3.72	15	1.68	188	0.0797872	0.494681	0	0	0		0	0	0	0	0	0
8	H488380	1997	1998	RøGu=x98	9.52	4.92	31	1.92828	238	0.130252	0.516807	1	H488068	1	11.68	5.48	25	2.2482	292	0.0856164	0.469178	2	1	3.22581	0.0357143	H488064	7.52	3.72	15	1.68	188	0.0797872	0.494681	0	0	0		0	0	0
9	H488459	1998	1999	GuOl=x99	10.72	5.92	25	1.9032	268	0.0932836	0.552239	1	H488087	2	12.36	7.48	40	2.29956	309	0.12945	0.605178	2	16	64	0.492308	H514145	9.88	4.92	29	2.479	247	0.117409	0.497976	3	12	0.111111	3	0	0	0	6	15	0.173913
10	H488498	1998	1999	Ol=Gux99	11.84	5.8	28	2.20264	296	0.0945946	0.489865	1	H488501	1	10.6	5.56	41	2.10688	265	0.154717	0.524528	2	11	39.2857	0.318841
11	H514720	1998	1999	Ol=Xgu-99	8.64	4.28	36	1.9972	216	0.166667	0.49537	1	H514074	2	8.56	4.16	32	1.57296	214	0.149533	0.485981	2	10	27.7778	0.294118
12	3H43117	2003	2004		11.16	6.24	24	2.24908	279	0.0860215	0.55914	1	3H43030	1	10.28	6.04	53	2.11592	257	0.206226	0.587549	1	2	8.33333	0.0519481	2H59577	9.8	4.8	16	2.10624	245	0.0653061	0.489796	0	0	0		0	0	0	2	3.77358	0.057971	2	3.77358	0.043956
13	3H43122	2003	2004		9.96	4.08	22	1.95996	249	0.0883534	0.409639	1	3H43026	1	11.76	4.6	21	1.9436	294	0.0714286	0.391156	2	4	18.1818	0.186047	3H43105	12.36	5.92	38	2.72524	309	0.122977	0.478964	3	13.6364	0.1	2	1	4.54545	0.0333333	3	14.2857	0.101695	1	4.7619	0.0540541
14	6H39222(x=-)	2007	2008	T380 x=HbBl(x=-)	9.52	5.28	26	2.07676	238	0.109244	0.554622	1	3H43317	2	9.96	3.8	20	1.8738	249	0.0803213	0.381526	2	3	11.5385	0.130435	6H39093	11.44	6.56	58	2.62424	286	0.202797	0.573427	2	7.69231	0.047619	2	2	7.69231	0.047619	8	40	0.205128	5	25	0.277778
15	6H39427	2008	2009	T281-Lb=Hvx)	9.72	6	50	2.16528	243	0.205761	0.617284	1	6H39541	1	7.04	4.24	36	1.88636	176	0.204545	0.602273	2	4	8	0.0930233	6H39403	9.8	4.72	28	2.0244	245	0.114286	0.481633	0	0	0		0	0	0	0	0	0
16	6H39169	2007	2009	GuBl=x (A041)	8.56	4.4	22	1.88884	214	0.102804	0.514019	2	6H39066	1	8.4	3.92	22	1.71684	210	0.104762	0.466667	2	3	13.6364	0.136364	6H39067	8.84	3.84	16	1.99032	221	0.0723982	0.434389	1	4.54545	0.0526316	1	0	0	0	8	36.3636	0.421053	3	13.6364	0.075
17	6H39942	2010	2011	H35_1(Ol=Gux, 6H39942)	7.28	2.92	12	1.74412	182	0.0659341	0.401099	1	6H39753	1	10.72	5.96	47	2.17776	248	0.189516	0.55597	1	0	0	0
18	6H39977	2010	2011	Hv=R_x, 6H39977	10.16	5.08	25	1.9912	254	0.0984252	0.5	1	6H39764	1	9.88	5.16	32	1.69656	247	0.129555	0.522267	1	12	48	0.421053	6H39736	9.08	4.68	45	2.06952	227	0.198238	0.515419	6	24	0.171429	5	1	4	0.0285714	4	12.5	0.103896
19	6H39641	2009	2011	A071(R_=xHv, 6H39641)	9.56	5.52	50	2.24036	239	0.209205	0.577406	2	6H39275	2	9.72	5.68	34	1.86388	243	0.139918	0.584362	2	9	18	0.214286
20	6H39955	2010	2012	A089(Gu=Orx-6H39955-2012	6	2.4	12	1.31156	150	0.08	0.4	2	6H39169	2	10.6	5.68	39	2.20132	265	0.14717	0.535849	2	5	41.6667	0.196078
21	6H39971	2010	2012	A109(Gu=xOr-6H39971-2012	8	3.44	28	1.94952	200	0.14	0.43	2	6H39731	1	12.4	6.76	53	2.8118	310	0.170968	0.545161	2	11	39.2857	0.271605
22	9H48277	2012	2013	HL010	9.4	4.4	38	2.15956	235	0.161702	0.468085	1	9H48201	1	8.72	3.56	31	1.83	218	0.142202	0.408257	1	1	2.63158	0.0289855	2H60109	7.2	3.08	21	1.3444	180	0.116667	0.427778	6	15.7895	0.20339	2	4	10.5263	0.135593
23	9H48275	2012	2013	A151	11.32	5	17	2.78	283	0.0600707	0.441696	1	9H48201	1	8.72	3.56	31	1.83	218	0.142202	0.408257	1	1	5.88235	0.0416667	2H60109	7.2	3.08	21	1.3444	180	0.116667	0.427778	4	23.5294	0.210526	2	2	11.7647	0.105263	2	6.45161	0.0769231	0	0	0
24	HC72461	2013	2014	HL041	9.08	4.44	16	1.83568	227	0.0704846	0.488987	1	9H48275	1	11.32	5	17	2.78	283	0.0600707	0.441696	2	5	31.25	0.30303
25	HC72127	2012	2014	HL051	7.92	3.64	18	1.95108	198	0.0909091	0.459596	2	9H48202	1	9.56	3.88	21	1.71208	239	0.0878661	0.405858	2	1	5.55556	0.0512821	9H48209	8.24	7.04	14	1.60432	206	0.0679612	0.854369	0	0	0		0	0	0	0	0	0	4	19.0476	0.190476
26	HC72168	2012	2014	HL081	10.28	5.92	65	2.4216	257	0.252918	0.575875	2	9H48207	1	6.04	3.24	20	2.4216	151	0.13245	0.536424	1	5	7.69231	0.117647
27	HC72376	2014	2015	HL007	8.28	3.16	20	1.95656	207	0.0966184	0.381643	1	HC72461	1	9.08	4.44	16	1.83568	227	0.0704846	0.488987	1	2	10	0.111111
28	HC72460	2013	2015	HL009	8.12	3.12	14	1.72668	203	0.0689655	0.384236	2	9H48275	1	11.32	5	17	2.78	283	0.0600707	0.441696	1	4	28.5714	0.258065
Average					9.07286	4.45	27.7857	1.94351	226.821	0.12184	0.494475				10.0169	5.02462	33.4231	2.03781	249.385	0.13538	0.500016			20.6978	0.173377		9.088	4.60267	24.7333	1.97415	227.2	0.106312	0.505801	1.86667	7.37892	0.0676288	2	0.8	2.95439	0.0283085	3.33333	12.1614	0.114642	2.5	11.0366	0.106877
Variance					2.29938	1.23433	195.656	0.113446	1437.12	0.00295581	0.00633491				2.56327	1.00029	181.286	0.123709	1588.4	0.00256665	0.00568929						2.19776	1.34548	166.638	0.169618	1373.6	0.00187367	0.0106937	4.55238	73.6577	0.00588308	2	1.31429	16.584	0.00174839	8.06061	177.617	0.0136962	3.5	95.9683	0.0110768
